# Supplementary material for: Endogenous retroviruses are a source of enhancers with oncogenic potential in acute myeloid leukaemia
Source: PubMed Central journal article supplement (PMC7360734; doi:10.1038/s41467-020-17206-4), 2020-07-14
Supplement: 41467_2020_17206_MOESM3_ESM.pdf [file 41467_2020_17206_MOESM3_ESM.pdf]

## **Description of Additional Supplementary Files**

File Name: Supplementary Data 1

Description: Results of DHS permutation test for each repeat family.

File Name: Supplementary Data 2

Description: List of AML-associated spliced transcripts emanated from A-DARs.

File Name: Supplementary Data 3

Description: K562-enriched TFs that are bound to A-DARs.

File Name: Supplementary Data 4

Description: TF motif frequency within A-DARs with and without DHSs.

File Name: Supplementary Data 5

Description: Results from the analysis of motif enrichment (MEME suite).

File Name: Supplementary Data 6

Description: Differentially expressed genes in upon CRISPRi.

File Name: Supplementary Data 7

Description: List of ERV elements that display regulatory activity in myeloid leukemia.

File Name: Supplementary Data 8

Description: Primers used in this study.

File Name: Supplementary Data 9

Description: External datasets used in this study.
