# Supplementary material for: Endogenous retroviruses are a source of enhancers with oncogenic potential in acute myeloid leukaemia
Source: PubMed Central journal article supplement (PMC7360734; doi:10.1038/s41467-020-17206-4), 2020-07-14
Supplement: 41467_2020_17206_MOESM13_ESM.pdf [file 41467_2020_17206_MOESM13_ESM.pdf]

## Reporting Summary

Nature Research wishes to improve the reproducibility of the work that we publish. This form provides structure for consistency and transparency in reporting. For further information on Nature Research policies, see [Authors & Referees](#) and the [Editorial Policy Checklist](#).

### Statistics

For all statistical analyses, confirm that the following items are present in the figure legend, table legend, main text, or Methods section.

n/a Confirmed

- |                                     |                                     |                                                                                                                                                                                                                                                            |
|-------------------------------------|-------------------------------------|------------------------------------------------------------------------------------------------------------------------------------------------------------------------------------------------------------------------------------------------------------|
| <input type="checkbox"/>            | <input checked="" type="checkbox"/> | The exact sample size ( $n$ ) for each experimental group/condition, given as a discrete number and unit of measurement                                                                                                                                    |
| <input type="checkbox"/>            | <input checked="" type="checkbox"/> | A statement on whether measurements were taken from distinct samples or whether the same sample was measured repeatedly                                                                                                                                    |
| <input type="checkbox"/>            | <input checked="" type="checkbox"/> | The statistical test(s) used AND whether they are one- or two-sided<br><i>Only common tests should be described solely by name; describe more complex techniques in the Methods section.</i>                                                               |
| <input checked="" type="checkbox"/> | <input type="checkbox"/>            | A description of all covariates tested                                                                                                                                                                                                                     |
| <input type="checkbox"/>            | <input checked="" type="checkbox"/> | A description of any assumptions or corrections, such as tests of normality and adjustment for multiple comparisons                                                                                                                                        |
| <input type="checkbox"/>            | <input checked="" type="checkbox"/> | A full description of the statistical parameters including central tendency (e.g. means) or other basic estimates (e.g. regression coefficient) AND variation (e.g. standard deviation) or associated estimates of uncertainty (e.g. confidence intervals) |
| <input type="checkbox"/>            | <input checked="" type="checkbox"/> | For null hypothesis testing, the test statistic (e.g. $F$ , $t$ , $r$ ) with confidence intervals, effect sizes, degrees of freedom and $P$ value noted<br><i>Give <math>P</math> values as exact values whenever suitable.</i>                            |
| <input checked="" type="checkbox"/> | <input type="checkbox"/>            | For Bayesian analysis, information on the choice of priors and Markov chain Monte Carlo settings                                                                                                                                                           |
| <input checked="" type="checkbox"/> | <input type="checkbox"/>            | For hierarchical and complex designs, identification of the appropriate level for tests and full reporting of outcomes                                                                                                                                     |
| <input checked="" type="checkbox"/> | <input type="checkbox"/>            | Estimates of effect sizes (e.g. Cohen's $d$ , Pearson's $r$ ), indicating how they were calculated                                                                                                                                                         |

*Our web collection on [statistics for biologists](#) contains articles on many of the points above.*

### Software and code

Policy information about [availability of computer code](#)

|                 |                                                                                                                                                                                                                                                                                                                                                      |
|-----------------|------------------------------------------------------------------------------------------------------------------------------------------------------------------------------------------------------------------------------------------------------------------------------------------------------------------------------------------------------|
| Data collection | High-throughput sequencing: NextSeq System Suite v2.1.2<br>qPCR: Roche LightCycler 480 Software v1.5<br>FACS: FACS Diva Software v6.1.3                                                                                                                                                                                                              |
| Data analysis   | Open source software: trim_galore! v0.4.5, Bowtie2 v2.1.0, MACS2 v2.1.1, F-seq v1.84, Hisat2 v2.0.5, DESeq2, deepTools2.0, StringTie v1.3.3b, MEME SUITE v5.0.1, Seqmonk v1.42.0<br>Custom scripts used for data analysis are available at <a href="https://github.com/MBrancoLab/Deniz_2019_AML">https://github.com/MBrancoLab/Deniz_2019_AML</a> . |

For manuscripts utilizing custom algorithms or software that are central to the research but not yet described in published literature, software must be made available to editors/reviewers. We strongly encourage code deposition in a community repository (e.g. GitHub). See the Nature Research [guidelines for submitting code & software](#) for further information.

### Data

Policy information about [availability of data](#)

All manuscripts must include a [data availability statement](#). This statement should provide the following information, where applicable:

- Accession codes, unique identifiers, or web links for publicly available datasets
- A list of figures that have associated raw data
- A description of any restrictions on data availability

High-throughput sequencing data that support the findings of this study have been deposited in the Gene Expression Omnibus (GEO) with the accession code GSE136764 [<https://www.ncbi.nlm.nih.gov/geo/query/acc.cgi?acc=GSE136764>]. Source data for figures 4B-D, 5E, 6C-G, and supplementary figures 8A, 8B, 8E, 9C-H, 11C and 11D are provided with the paper.

A list of publicly available datasets used in this study are listed in Supplementary Table 8. Additionally, the following public databases were used: GENCODE v26 [[https://www.encodegenes.org/human/release\\_26.html](https://www.encodegenes.org/human/release_26.html)], FANTOM5 [<https://fantom.gsc.riken.jp>], Dfam [<https://dfam.org/home>], HOCOMOCO v11 [<https://hocomoco11.autosome.ru>].

## Field-specific reporting

Please select the one below that is the best fit for your research. If you are not sure, read the appropriate sections before making your selection.

Life sciences       Behavioural & social sciences       Ecological, evolutionary & environmental sciences

For a reference copy of the document with all sections, see [nature.com/documents/nr-reporting-summary-flat.pdf](https://www.nature.com/documents/nr-reporting-summary-flat.pdf)

## Life sciences study design

All studies must disclose on these points even when the disclosure is negative.

|                 |                                                                                                                                                                                                                                                                                                                                                                                                                                                                                                                                                                                                                                                                                                                                              |
|-----------------|----------------------------------------------------------------------------------------------------------------------------------------------------------------------------------------------------------------------------------------------------------------------------------------------------------------------------------------------------------------------------------------------------------------------------------------------------------------------------------------------------------------------------------------------------------------------------------------------------------------------------------------------------------------------------------------------------------------------------------------------|
| Sample size     | The number of AML patient samples analysed was conditioned by the availability of public datasets.<br><br>For functional assays using CRISPR-mediated genetic and epigenetic editing experiments, sample sizes were chosen based on published results from similar experiments from our lab (PMID: 31012843) and others (PMID: 30070637, 31006620).                                                                                                                                                                                                                                                                                                                                                                                          |
| Data exclusions | No data were excluded.                                                                                                                                                                                                                                                                                                                                                                                                                                                                                                                                                                                                                                                                                                                       |
| Replication     | Findings related to open chromatin at ERVs were replicated across three different cell lines and in two independent cohorts of primary samples.<br><br>Histone ChIP-seq data showed similar patterns across primary patient samples and four different cell lines, with some variability expected from the heterogeneity of AML, consistent with previous studies.<br><br>A minimum of three independent clones were analysed in CRISPR experiments, with reproducible outcomes.<br><br>CRISPRi was performed in two different cell lines, with similar phenotypic outcomes.<br><br>The effects of APOC1-LTR2 inactivation were consistent between CRISPRi, plasmid-based CRISPR and lentiviral CRISPR, and across two different cell lines. |
| Randomization   | Randomization is not relevant, as no treatments were assigned to different subjects.                                                                                                                                                                                                                                                                                                                                                                                                                                                                                                                                                                                                                                                         |
| Blinding        | Blinding was not used, as all data produced was from objective quantitative methods.                                                                                                                                                                                                                                                                                                                                                                                                                                                                                                                                                                                                                                                         |

## Reporting for specific materials, systems and methods

We require information from authors about some types of materials, experimental systems and methods used in many studies. Here, indicate whether each material, system or method listed is relevant to your study. If you are not sure if a list item applies to your research, read the appropriate section before selecting a response.

### Materials & experimental systems

|                                     |                                                           |
|-------------------------------------|-----------------------------------------------------------|
| n/a                                 | Involved in the study                                     |
| <input type="checkbox"/>            | <input checked="" type="checkbox"/> Antibodies            |
| <input type="checkbox"/>            | <input checked="" type="checkbox"/> Eukaryotic cell lines |
| <input checked="" type="checkbox"/> | <input type="checkbox"/> Palaeontology                    |
| <input checked="" type="checkbox"/> | <input type="checkbox"/> Animals and other organisms      |
| <input checked="" type="checkbox"/> | <input type="checkbox"/> Human research participants      |
| <input checked="" type="checkbox"/> | <input type="checkbox"/> Clinical data                    |

### Methods

|                                     |                                                    |
|-------------------------------------|----------------------------------------------------|
| n/a                                 | Involved in the study                              |
| <input type="checkbox"/>            | <input checked="" type="checkbox"/> ChIP-seq       |
| <input type="checkbox"/>            | <input checked="" type="checkbox"/> Flow cytometry |
| <input checked="" type="checkbox"/> | <input type="checkbox"/> MRI-based neuroimaging    |

## Antibodies

|                 |                                                                                                                                                                                                                                                                                                                                                                                                                                                                                                           |
|-----------------|-----------------------------------------------------------------------------------------------------------------------------------------------------------------------------------------------------------------------------------------------------------------------------------------------------------------------------------------------------------------------------------------------------------------------------------------------------------------------------------------------------------|
| Antibodies used | Cas9 antibody (Diagenode #C15200229-100), H3K27ac antibody (Active Motif #3913), H3K9me3 antibody (Diagenode#C15410193).                                                                                                                                                                                                                                                                                                                                                                                  |
| Validation      | Cas9 antibody ( <a href="https://www.diagenode.com/en/p/crispr-cas9-monoclonal-antibody-100-ug">https://www.diagenode.com/en/p/crispr-cas9-monoclonal-antibody-100-ug</a> ), H3K27ac antibody ( <a href="https://www.activemotif.com/catalog/details/39135">https://www.activemotif.com/catalog/details/39135</a> ), H3K9me3 antibody ( <a href="https://www.diagenode.com/en/p/h3k9me3-polyclonal-antibody-premium-50-mg">https://www.diagenode.com/en/p/h3k9me3-polyclonal-antibody-premium-50-mg</a> ) |

## Eukaryotic cell lines

Policy information about [cell lines](#)

|                                                                   |                                                                                                                                                                                                                                                                                                                                                 |
|-------------------------------------------------------------------|-------------------------------------------------------------------------------------------------------------------------------------------------------------------------------------------------------------------------------------------------------------------------------------------------------------------------------------------------|
| Cell line source(s)                                               | OCI-AML3, MOLM-13 and HL-60 cell lines were provided by Professor Brian Huntly, originally sourced from DSMZ. K562 cell line was provided by Dr Farideh Miraki-Moud, originally derived by Lozzio & Lozzio (PMID: 163658). HEK293T cell line was provided by Dr. Ana O'Loghlen, originally derived in the lab of Michele Calos (PMID: 3031469). |
| Authentication                                                    | Cell lines were not authenticated.                                                                                                                                                                                                                                                                                                              |
| Mycoplasma contamination                                          | K562 and OCI-AML3 cell lines were tested negative for mycoplasma. HL-60 and MOLM-13 were not tested.                                                                                                                                                                                                                                            |
| Commonly misidentified lines (See <a href="#">ICLAC</a> register) | No commonly misidentified cell lines were used.                                                                                                                                                                                                                                                                                                 |

## ChIP-seq

### Data deposition

- Confirm that both raw and final processed data have been deposited in a public database such as [GEO](#).
- Confirm that you have deposited or provided access to graph files (e.g. BED files) for the called peaks.

Data access links  
*May remain private before publication.*

<https://www.ncbi.nlm.nih.gov/geo/query/acc.cgi?acc=GSE136764>

Files in database submission

Raw fastq files, Broadpeak files and Bigwig track files.

Genome browser session  
(e.g. [UCSC](#))

[https://genome.ucsc.edu/s/mbranco/AML\\_ERVs](https://genome.ucsc.edu/s/mbranco/AML_ERVs)

### Methodology

Replicates

Duplicate ChIP-seq experiments were performed for H3K27ac (K562 and OCI-AML3) and H3K9me3 (K562) LTR2B CRISPRi experiments. For all remaining samples, one replicate was sequenced.

| Sample:                       | Read count: |
|-------------------------------|-------------|
| HL-60_H3K27ac                 | 42164835    |
| HL-60_Input                   | 27097144    |
| Molm13_H3K27ac                | 34975107    |
| Molm13_Input                  | 18955819    |
| OCI-AML3-empty_H3K27ac        | 45904772    |
| OCI-AML3_LTR2BgRNAs_H3K27ac-1 | 44716424    |
| OCI-AML3_LTR2BgRNAs_H3K27ac-2 | 53152894    |
| OCI-AML3_empty_H3K9me3        | 54434074    |
| OCI-AML3_LTR2BgRNAs_H3K9me3-1 | 56001564    |
| OCI-AML3_LTR2BgRNAs_H3K9me3-2 | 25844346    |
| OCI-AML3_Input                | 15625705    |
| K562-empty_H3K27ac            | 47696761    |
| K562_LTR2BgRNAs_H3K27ac-1     | 52733589    |
| K562_LTR2BgRNAs_H3K27ac-2     | 44289180    |
| K562_empty_H3K9me3            | 27083662    |
| K562_LTR2BgRNAs_H3K9me3       | 36798980    |
| K562_empty_dCas9              | 30867854    |
| K562_LTR2BgRNAs_dCas9         | 166807135   |
| K562_Input                    | 50120809    |

Antibodies

Cas9 antibody (Diagenode #C15200229-100), H3K27ac antibody (Active Motif #3913), H3K9me3 antibody (Diagenode#C15410193).

Peak calling parameters

Adaptors and low-quality base calls were trimmed using trim\_galore! v0.4.5 with default parameters. Trimmed reads were mapped to hg38 using bowtie2 v2.3.4 with default parameters. Uniquely aligned reads were extracted using a custom perl script.  
Peaks were called using MACS2 v2.1.1 with -q 0.05; --broad was used for histone modifications

Data quality

FastQC was used to assess raw data quality. Peak detection was performed with a q-value cut-off of 0.05.

Software

MACS2 v2.1.1 for peak detection. Other custom scripts are available at [https://github.com/MBrancoLab/Deniz\\_2019\\_AML](https://github.com/MBrancoLab/Deniz_2019_AML).

### Plots

Confirm that:

- The axis labels state the marker and fluorochrome used (e.g. CD4-FITC).
- The axis scales are clearly visible. Include numbers along axes only for bottom left plot of group (a 'group' is an analysis of identical markers).
- All plots are contour plots with outliers or pseudocolor plots.
- A numerical value for number of cells or percentage (with statistics) is provided.

### Methodology

Sample preparation

Cell cycle assay was performed using muse cell cycle kit by following manufacturers instructions (Millipore). For apoptosis assay, the cells were stained by an annexin V 647 (Thermofisher Scientific) and DAPI.

Instrument

BD FACS Canto II

Software

BD FACSDiva Software v6.1.3

Cell population abundance

Cell population abundance of Annexin V stained cells is indicated in Figure 6G. The bar plot indicates the average percentage of Annexin V positive cell population in control cells with no gRNA and cells with LTR2 gRNA

Gating strategy

Cells were gated on a FSC-A vs SSC-A dot-plot with debris excluded. Single cells were gated on a FSC-A vs SSC-W parameter dot-plot, with further gating on a DAPI-A vs Annexin V-AF647 dot-plot. Quadrant gating on the DAPI vs Annexin V-Af647 dot-plot allows the determination of percentage live cells (DAPI-ve/Annexin V-ve), early apoptosis (DAPI-ve/Annexin V+ve), late apoptosis (DAPI+ve/Annexin V+ve) and necrotic (DAPI+ve/Annexin V-ve).

- Tick this box to confirm that a figure exemplifying the gating strategy is provided in the Supplementary Information.
